## FLIGHT KINEMATICS OF THE BARN SWALLOW (*HIRUNDO RUSTICA*) OVER A WIDE RANGE OF SPEEDS IN A WIND TUNNEL

KIRSTY J. PARK<sup>1,\*</sup>, MIKAEL ROSÉN<sup>2</sup> AND ANDERS HEDENSTRÖM<sup>2</sup>

<sup>1</sup>Department of Biological Sciences, University of Stirling, Stirling FK9 4LA, UK and <sup>2</sup>Department of Animal Ecology, Lund University, SE-223 62 Lund, Sweden

\*Author for correspondence (e-mail: k.j.park@stir.ac.uk)

Accepted 14 May 2001

### Summary

Two barn swallows (*Hirundo rustica*) flying in the Lund wind tunnel were filmed using synchronised high-speed cameras to obtain posterior, ventral and lateral views of the birds in horizontal flapping flight. We investigated wingbeat kinematics, body tilt angle, tail spread and angle of attack at speeds of 4–14 m s<sup>-1</sup>. Wingbeat frequency showed a clear U-shaped relationship with air speed with minima at 8.9 m s<sup>-1</sup> (bird 1) and 8.7 m s<sup>-1</sup> (bird 2). A method previously used by other authors of estimating the body drag coefficient ( $C_{D,par}$ ) by obtaining agreement between the calculated minimum power ( $V_{min}$ ) and the observed minimum wingbeat frequency does not appear to be valid in this species, possibly due to upstroke pauses that occur at intermediate and high speeds, causing the apparent wingbeat frequency to be lower. These upstroke

pauses represent flap-gliding, which is possibly a way of adjusting the force generated to the requirements at medium and high speeds, similar to the flap-bound mode of flight in other species. Body tilt angle, tail spread and angle of attack all increase with decreasing speed, thereby providing an additional lift surface and suggesting an important aerodynamic function for the tail at low speeds in forward flight. Results from this study indicate the high plasticity in the wingbeat kinematics and use of the tail that birds have available to them in order to adjust the lift and power output required for flight.

Key words: flight, kinematics, wind tunnel, flap-gliding, barn swallow, *Hirundo rustica*.

### Introduction

During horizontal powered flight, a bird must flap its wings to generate lift and thrust to overcome gravity and drag. The instantaneous forces on the wings vary during the course of a wingbeat cycle due to time-varying wing planform, degree of flexing the elbow and wrist joints, angle of attack, wing twist, rotational velocity of wings, elastic properties of the primaries, forward velocity, etc. The kinematics of a wingbeat are dynamically a very complicated process, yet it contains the physical key to the mechanical power required to fly, and hence is of interest to researchers.

Depending on species, i.e. size and morphology, birds flap their wings continuously or in bursts, with wingbeats interspersed by phases of glides or bounds, the latter flight mode resulting in a sinusoidal flight trajectory around the horizontal level. Species using bounding flight or intermittent flight (wings not completely folded during the non-flapping phase) include the budgerigar *Melopsittacus undulatus*, finches such as the zebra finch *Taenopygia guttata*, the starling *Sturnus vulgaris* and woodpeckers (Rayner, 1995; Tobalske, 1995; Tobalske, 1996; Tobalske and Dial, 1994; Tobalske et al., 1999). In birds that typically use continuous flapping flight, some characteristics of the wingbeat kinematics change with

speed. For example, in some species the relation between wingbeat frequency and speed is U-shaped (Pennycuick et al., 1996), in a way similar to the mechanical power output of bird flight (Pennycuick, 1975; Pennycuick, 1989a; Rayner, 1979; Rayner, 1999). In other species, such as the starling, wingbeat frequency appears to have a more or less linear relationship with air speed (Tobalske, 1995), or there is no systematic change with speed (black-billed magpies *Pica pica* and pigeons *Columba livia*; Tobalske and Dial, 1996). Other features of wingbeat kinematics related to force generation may also change in relation to forward air speed.

Birds' tails also play an important aerodynamic role in mechanical flight power and flight performance. Conventional models of bird flight ignore the tail (e.g. Pennycuick, 1989a), although it has been calculated that the tail of many birds could generate as much as a third of the total lift required to support a bird's weight (Thomas, 1995).

In this paper we present data on wing and tail kinematics over a wide range of speeds in two swallows *Hirundo rustica* flying in a wind tunnel. We observed interesting features associated with flapping flight and we discuss these findings in relation to the theory of flight mechanics.

## Materials and methods

### Windtunnel

The experiment was conducted in a low-turbulence, closed-circuit wind tunnel at Lund University, Sweden (for design details see Pennycuick et al., 1997). The test section is octagonal in cross section and is 1.22 m wide by 1.08 m high. The first 1.20 m length of the test section is enclosed by Plexiglas walls, and the last 0.5 m is open, giving unrestricted access to the bird. A pitot-static survey showed that the air speed was within  $\pm 1.3\%$  of the mean across 97.5% of the test section, only deviating from this value at three corner points, while hot-wire anemometer measurements showed that the turbulence in the closed part of the test section was as low as 0.04% of the wind speed (Pennycuick et al., 1997). A fine nylon net of thread diameter 0.15 mm, with a mesh size of 29 mm $\times$ 29 mm, was placed across the exit from the contraction approximately 50 cm upstream from the position of the bird in the test section. This net will introduce a small additional turbulence into the flow (Pennycuick et al., 2000).

### Equivalent air speed

The Lund wind tunnel uses dynamic pressure ( $q$ ) to set the equivalent air speed ( $V_e$ ), which can be defined as

$$V_e = \sqrt{2q/\rho_0}, \quad (1)$$

where  $\rho_0$  is the value assumed for the air density (1.23 kg m $^{-3}$ ) at sea level under International Standard Atmospheric conditions. The disparity between true and equivalent air speed varies depending on changes in air temperature and barometric pressure. Equivalent air speed is used throughout this paper, as it is this that determines the magnitudes of the aerodynamic forces acting upon the bird.

### Birds and training

Four adult male barn swallows *Hirundo rustica* (L.) were caught near Lund, Sweden, on May 21, 1999. All were willing to fly in the wind tunnel from the beginning but two birds flew more steadily and for longer periods than the others and were therefore chosen for the experiment (for morphological details see Table 1). Over the first week each of the birds was trained to fly in the wind tunnel for approximately 1 h per day. After this the two birds used in this experiment were sufficiently steady in flight (maintaining their position in the horizontal and vertical planes) for data collection. All birds were released at the original capture site after the experiment was completed on June 16, 1999.

### Kinematic analysis

Swallows were filmed while flying in the wind tunnel using two high-speed RedLake video cameras (Motionscope PCI 500, USA) at 125 frames s $^{-1}$  and with the shutter open for 1/1875 s. The cameras were synchronised to record simultaneous images of the bird from different angles. The camera output was directly transferred *via* frame grabbers to a PC (Pentium II 233 MHz) in the form of two animation (.AVI

Table 1. *Body and wing measurements for the two male barn swallows studied in the wind tunnel*

|           | Mass<br>(kg) | Wing span<br>(m) | Wing area<br>(m $^2$ ) | Aspect<br>ratio* | REF‡<br>(mm) |
|-----------|--------------|------------------|------------------------|------------------|--------------|
| Swallow 1 | 0.0190       | 0.318            | 0.01365                | 7.4              | 94           |
| Swallow 2 | 0.0180       | 0.328            | 0.01447                | 7.4              | 94           |

\*Aspect ratio is defined as wing span squared divided by wing area.

‡Reference length on the bird is from the well-defined angle between the leading edge of the wing and the body to the tip of the central tail feather, used for measuring wing spans from images.

files, one from each camera. Individual frames were extracted from these files as sequences of compressed (.JPG) monochrome picture files, measuring 480 pixels $\times$ 420 pixels, where pixels were square (aspect ratio 1). Flight sequences, averaging 1.3 s in duration, of posterior (image plane  $x,z$ ) and ventral (image plane  $y,z$ ) views of the swallows were obtained by positioning one camera behind the test section far back in the first diffuser without affecting the flow in the test section (see Pennycuick et al., 1997), and the other underneath the test section. The coordinate axes are defined as:  $x$ , direction of flow;  $y$ , vertical direction;  $z$ , perpendicular to  $x$  and  $y$ . The distance of the ventral-view camera to the bird was about 70 cm, while the posterior-view camera was placed 3 m behind the bird. Swallows were filmed in steady flight at 1 m s $^{-1}$  intervals between 4 and 14 m s $^{-1}$ . Air speeds were set randomly and five flight sequences were obtained for each air speed. Bird 2 would not fly at 14 m s $^{-1}$  so the top air speed for this bird was 13 m s $^{-1}$ . After five flight sequences at each air speed had been obtained for posterior and ventral views, one of the cameras was moved to the side of the test section and lateral views of swallows were filmed to obtain body and tail-tilt angles. Again, five replicate flight sequences containing one full wingbeat were obtained for each air speed. Film analysis was carried out using Redlake Imaging Motionscope 2.16, allowing pixels to be marked and reading of current pixel coordinates, which allowed the calculation of angles between lines. Wing areas were measured in Mapinfo Professional 4.5 by using the reference length on the bird (see Table 1). The following data were extracted from the posterior, ventral and lateral views of the swallows in flight.

(1) Wingbeat frequency was calculated by dividing the number of wingbeats by the number of frames and converting the value to wingbeats s $^{-1}$  (Hz). To calculate the wingbeat cycle period the inverse of wingbeat frequency was taken.

(2) Wingbeat amplitude was calculated as the angle described by the pivoting of the right shoulder joint–wrist line during the time between the end of an upstroke and the end of the next downstroke (see Pennycuick et al., 2000). The shoulder joint was a well-defined point easily distinguished on the posterior-view images. Wingbeat amplitude using the shoulder joint–wingtip line was also calculated for direct comparison with other studies. The beginning or end of a

stroke was defined as the point where the wing amplitude angle reached maximum values above or below the horizontal in the  $xz$  plane. Ensuring that the bird was in horizontal flight, a maximum of 10 wingbeat amplitudes from the right wing was calculated for each flight sequence (range 1–10) and the average taken. From these data, the duration of the downstroke and its angular velocity, and the up- and downstroke fractions of the wingbeat cycle period, were also calculated. Downstroke angular velocity was calculated by converting the duration of the entire downstroke, in frames, to seconds and calculating velocity as radians per second. 8 ms per frame was the minimum time resolution for any instantaneous kinematic event, so the maximum error of stroke duration was 16 ms, which is about 20% of the maximum downstroke duration. Note that on average the error will be 8 ms for determining stroke duration, which is half that of the maximum.

(3) Wingspan. For each speed the lengths of the mid-downstroke and mid-upstroke wingspan (wingtip to wingtip) were measured and the span ratio expressed as the upstroke span divided by the downstroke span. Lengths were obtained using Mapinfo and a reference length of a known distance on the bird was used to calibrate the values (see Table 1). Three downstroke and upstroke spans were calculated and averaged for each flight sequence.

(4) Upstroke pauses. It was observed that in steady level flight swallows would occasionally pause for a fraction of a second in the middle of the upstroke. The duration of these pauses was measured and averaged per wingbeat with pauses across the entire flight sequence. Not all wingbeats exhibited such pauses and so we also noted the proportion of wingbeats with upstroke pauses. Due to the frame frequency (125 Hz) of the cameras, the minimum pause length that could be detected was if the wing remained in the same position on two consecutive frames, representing a minimum time of 8 ms. Our measurements hence underestimate the duration of the pauses by a maximum of 16 ms and on average 8 ms.

(5) Body-tilt angle was calculated from lateral flight sequences by drawing a line between the sharp angle of the inner dorsal bill and the feathering and the tip of the central tail feather, and measuring the angle of this line relative to the direction of airflow, given by the metal frame of the tunnel test section. Body-tilt angles at the end of the downstroke, mid-upstroke and the end of the upstroke were calculated and averaged for each flight sequence.

(6) Tail-spread angle and angle of attack were calculated from ventral and lateral flight sequences, respectively. Tail-spread angle was calculated by drawing two lines out from the centre of the tail (where it meets the body) to the tips of the tail streamers. Care was taken to use only those images where the bird was in steady forward flight (not moving side to side) and the streamers were straight-sided. Three tail-spread angles at mid-downstroke were measured and averaged for each flight sequence. Tail angle of attack was measured in a similar way to body tilt, measuring the angle of the line between the proximal and distal ends of the central tail feathers to the

direction of airflow. One measurement at mid-downstroke was made for each flight sequence.

### Statistics

Analyses were carried out using General Linear Models in MINITAB release 12.1 (Ryan et al., 1985). Mean values were calculated for the flight variables at each air speed. A model was constructed for each of the flight variables (dependent variable), with air speed (covariate) included initially as a linear, quadratic and up to quartic term, then sequentially removing the highest level non-significant terms. Residuals from the analyses were tested for normality (Anderson–Darling) and homoscedascity, and descriptive data are presented as means  $\pm$  S.E.M. The bootstrapping procedure was carried out using S-PLUS 4.5 (MathSoft Inc. 2000).

### Results

The lowest air speed at which the swallows were consistently able to maintain forward flapping flight was  $4 \text{ m s}^{-1}$ , although one swallow did fly briefly at  $3.4 \text{ m s}^{-1}$ . At air speeds lower than this the birds would adopt turning flight before settling

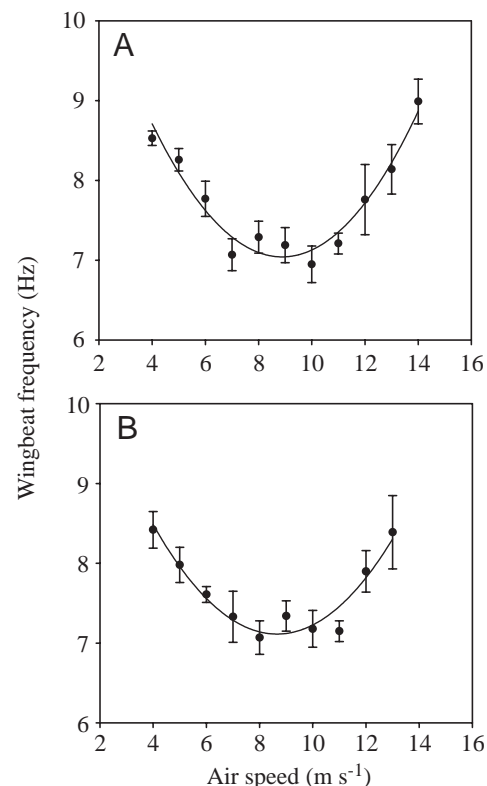

Fig. 1. Wingbeat frequency showed a significant curvilinear relationship (quadratic function) with air speed for both bird 1 (A) and bird 2 (B) (General Linear Model, GLM; bird 1:  $F_{1,8}=126.88$ ,  $P<0.0001$ ; bird 2:  $F_{1,8}=84.83$ ,  $P<0.0001$ ). The equations for the fitted curves are given in Table 2. The proportion of variance ( $r^2$ ) explained by the statistical model was extremely high for both birds (96.9% and 96.1%, respectively). Values are means  $\pm$  S.E.M. ( $N=5$  flight sequences).

Table 2. Equation of the fitted line for each of the analyses conducted

| Flight variable            | Bird           | Equation of the fitted line                       |
|----------------------------|----------------|---------------------------------------------------|
| Wingbeat frequency         | 1              | $12.56 - 1.24V + 0.070V^2$                        |
|                            | 2              | $11.85 - 1.09V + 0.063V^2$                        |
| Downstroke fraction        | 1              | $-0.24 + 0.14V - 0.0052V^2$                       |
|                            | 2              | $-0.093 + 0.10V - 0.0029V^2$                      |
| Wingbeat amplitude (wrist) | 1              | $48.00 + 5.03V$                                   |
|                            | 2              | $40.90 + 51.18V$                                  |
| Wingspan                   |                |                                                   |
|                            | Mid-downstroke | 1 $36.86 - 1.29V + 0.042V^2$<br>2 $32.56 - 0.29V$ |
| Mid-upstroke               | 1              | $19.85 - 1.29V$                                   |
|                            | 2              | $18.13 - 1.19V$                                   |
| Span ratio                 | 1              | $0.63 - 0.039V$                                   |
|                            | 2              | $0.58 - 0.037V$                                   |
| Body-tilt angle            | 1              | $32.08 - 3.51V + 0.11V^2$                         |
|                            | 2              | $39.37 - 5.70V + 0.25V^2$                         |
| Tail-angle of spread       | 1              | $178.26 - 52.88V + 5.27V^2 - 0.17V^3$             |
|                            | 2              | $213.90 - 85.63V + 13.35V^2 - 0.92V^3 + 0.024V^4$ |
| Tail-angle of attack       | 1              | $75.97 - 18.58V + 1.63V^2 - 0.049V^3$             |
|                            | 2              | $51.47 - 10.56V + 0.79V^2 - 0.019V^3$             |

The equations are described by the regression coefficients calculated by the General Linear Model (GLM).

$V$ , air speed ( $\text{m s}^{-1}$ ).

onto the base or sloping sides of the test section. The highest speed we were able to obtain film sequences for was  $14 \text{ m s}^{-1}$  (bird 1) or  $13 \text{ m s}^{-1}$  (bird 2). At air speeds higher than this the birds would fly for very short periods of time, but typically would hold on to the net at the back of the test section and appeared unable to maintain sufficient flight speed.

Data are presented graphically for the two swallows separately. Statistics are given in the figure legends, and equations for the fitted lines are provided in Table 2.

#### Wingbeat kinematics

Wingbeat frequency ranged from 6.95 to 8.99 Hz in bird 1, and 7.07 to 8.42 Hz in bird 2 and, for both birds, showed a curvilinear relationship with air speed (Fig. 1). The quadratic function of the relationship was derived from the regression coefficients, and differentiated to find the minima (wingbeat frequency *versus* air speed). Bootstrapping was used to generate a population of minima from the original data set allowing 95% confidence intervals to be estimated. Minimum wingbeat frequency speed for bird 1 was  $8.89 \text{ m s}^{-1}$  (95% confidence intervals:  $7.88\text{--}9.90 \text{ m s}^{-1}$ ), and for bird 2 it was  $8.66 \text{ m s}^{-1}$  ( $8.00\text{--}10.00 \text{ m s}^{-1}$ ). The corresponding wingbeat frequencies at these speeds were 7.04 Hz ( $6.62\text{--}7.50 \text{ Hz}$ ) for bird 1 and 7.11 Hz ( $6.67\text{--}7.51 \text{ Hz}$ ) for bird 2.

The wingbeat cycle period, i.e. the duration of a downstroke and upstroke, was divided into upstroke and downstroke

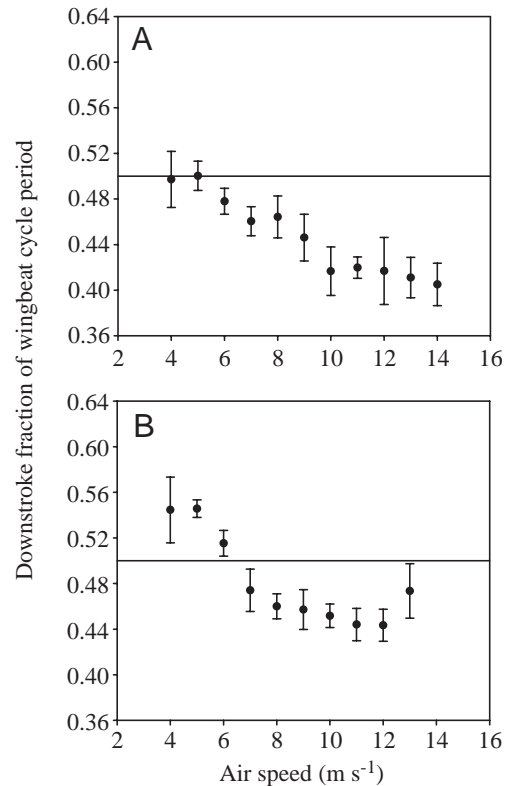

Fig. 2. The downstroke fraction of the wingbeat cycle period *versus* air speed for bird 1 (A) and bird 2 (B). Horizontal lines represent the fraction of 0.5 where the downstroke and upstroke fractions are equal. For both birds, the relationship between downstroke fraction and air speed was best represented by a quadratic function (GLM; bird 1:  $F_{1,8}=176.08$ ,  $P<0.0001$ ; bird 2:  $F_{1,7}=21.45$ ,  $P<0.01$ ). Values are means  $\pm$  S.E.M. ( $N=5$  flight sequences).

fractions. The downstroke fraction decreased from near 0.50 at  $4 \text{ m s}^{-1}$  to 0.40 at  $14 \text{ m s}^{-1}$  in bird 1 (Fig. 2). Bird 2 showed higher values with a similar decrease with air speed from 0.54 at  $4 \text{ m s}^{-1}$  to 0.45 at  $12 \text{ m s}^{-1}$ , but with a somewhat higher value at  $13 \text{ m s}^{-1}$ .

Wingbeat amplitude increased with air speed (Fig. 3A,B) from approximately  $70^\circ$  at low speeds to over  $120^\circ$  at high speeds. Wingbeat amplitude on the basis of wingtip movements yielded consistently higher values (approximately  $10^\circ$  higher) than shoulder joint–wrist amplitude (Fig. 3A,B), indicating that the wing bends at the wrist at the bottom of the downstroke. The duration of the downstroke increased between  $4 \text{ m s}^{-1}$  and  $7 \text{ m s}^{-1}$  and then decreased with increasing air speed (Fig. 3C). This pattern was more apparent in bird 1 than bird 2, which showed a peak in downstroke duration at  $5 \text{ m s}^{-1}$  (Fig. 3D). The angular velocity of the downstroke remained fairly constant at low speeds until an air speed of approximately  $7 \text{ m s}^{-1}$  was reached, after which angular velocity increased with air speed (Fig. 3E,F).

Wingspan was maximal at mid-downstroke and minimal during mid-upstroke. Mid-downstroke wingspan decreased with increasing air speed from approximately 32 cm at  $4 \text{ m s}^{-1}$  to between 26 cm (bird 1) and 29 cm (bird 2) at the highest



air speeds (Fig. 4A,B). Mid-upstroke wingspan and span ratio increased from  $4\text{ m s}^{-1}$  to maximum values at  $5\text{ m s}^{-1}$ . Both measures then showed a gradual and near-linear decline with further increasing air speed until approximately  $10\text{--}11\text{ m s}^{-1}$ , after which wingspan and span ratio showed little change (Fig. 4C–F).

A pause during the upstroke of the wingbeat cycle was only observed at air speeds exceeding  $8\text{ m s}^{-1}$  for bird 1, and  $5\text{ m s}^{-1}$  for bird 2. At these speeds, upstroke pauses (8–56 ms duration) did not always occur during every wingbeat cycle but would often skip a few wingbeats and then resume. Runs of wingbeats with upstroke pauses typically varied between 1 and 3, with a maximum of 6 consecutive wingbeats containing pauses. Both birds showed an initial increase in the duration of the upstroke pause, up to an average at about 20 ms at  $10\text{ m s}^{-1}$  (Fig. 5). The proportion of wingbeats with an upstroke pause was maximum at 61% at  $12\text{ m s}^{-1}$  for bird 1, and 69% at  $11\text{ m s}^{-1}$  for bird 2, with lower proportions below and above these speeds. The position of the wings during the pause was identical to that during mid-upstroke of wingbeats without a pause. Hence, during a pause the wings were held in a position so that some lift (and drag) was generated. The wingtip showed an elliptical trajectory at speeds of 4, 8 and  $12\text{ m s}^{-1}$  when viewed laterally, with the wingtip more anterior during the downstroke than during the upstroke (Fig. 6A). The path of the wingtip moved back along the horizontal axis of the bird with increasing speed, reflecting the fact that the wing was increasingly flexed at higher air speeds. From a rear view the wingtips also traced an elliptical trajectory, with a more distal position of the wingtip during the downstroke than during the upstroke (Fig. 6B). At  $12\text{ m s}^{-1}$ , the dense cluster of filled circles on the illustrated example indicates the position and duration of an upstroke pause as observed (Fig. 6).

#### Body tilt, tail spread and tail angle of attack

Body-tilt angle ranged from 5 to  $21^\circ$  from horizontal, decreasing with increasing air speed (Fig. 7). Changes in air speed from 4 to  $6\text{ m s}^{-1}$  caused marked reductions of approximately 40% in body-tilt angle. Once air speeds of  $11\text{--}12\text{ m s}^{-1}$  had been reached, body-tilt angle remained fairly constant at approximately  $5\text{--}8^\circ$ . The angle of tail spread at

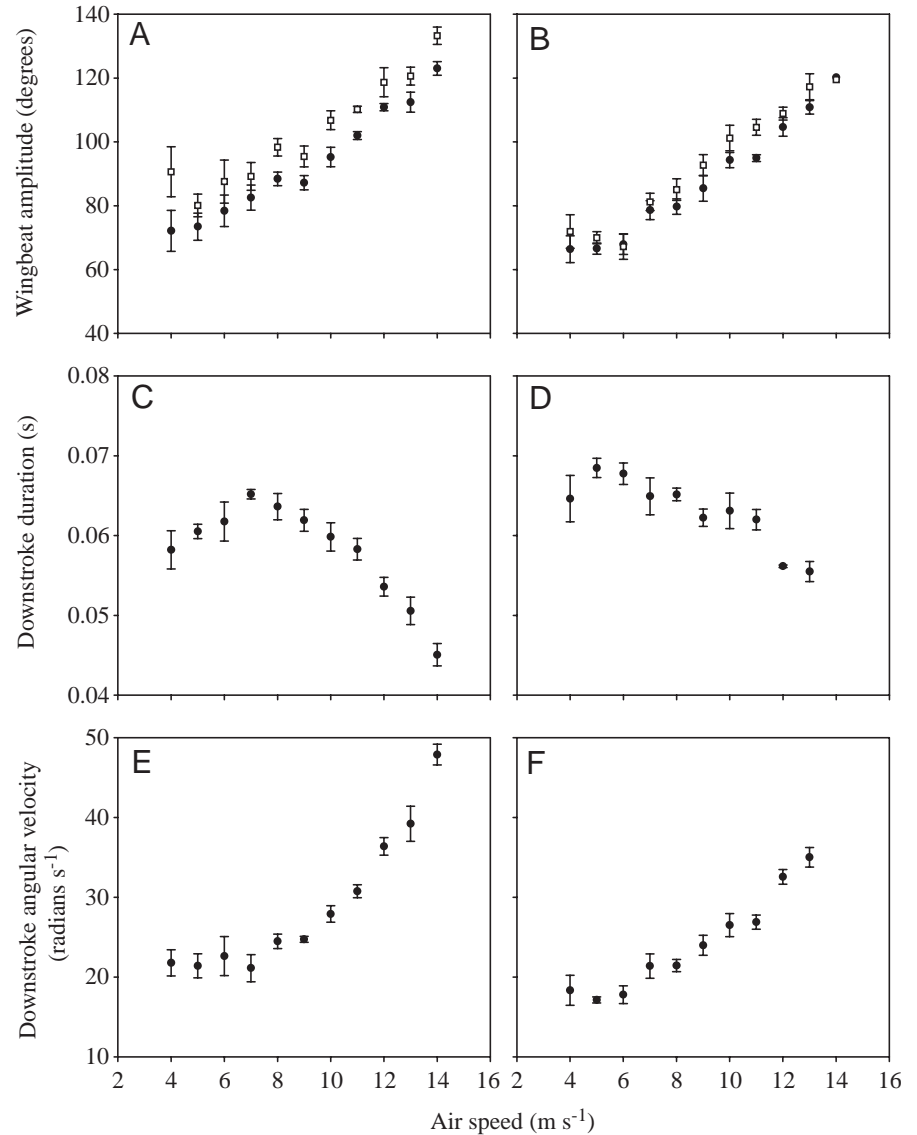

Fig. 3. (A,B) Wingbeat amplitude (wrist amplitude, filled circles; wingtip amplitude, open squares) increased with air speed (wrist amplitude; GLM; bird 1:  $F_{1,9}=276.05$ ,  $P<0.0001$ ,  $r^2=96.5\%$ ; bird 2:  $F_{1,8}=241.85$ ,  $P<0.0001$ ,  $r^2=96.4\%$ ). The duration of the downstroke (C,D) decreased, and the downstroke angular velocity (E,F) increased with air speeds exceeding  $7\text{ m s}^{-1}$ . A,C,E, bird 1; B,D,F, bird 2. Values are means  $\pm$  S.E.M.  $N=4$  at air speeds 11 and  $13\text{ m s}^{-1}$  (bird 2, D,F); all other  $N=5$  flight sequences.

very low air speeds reached a maximum of  $56.6^\circ$  (bird 2) at  $4\text{ m s}^{-1}$ , although the average tail-spread angle at this speed was considerably lower (Fig. 8B). For both birds tail-spread angle decreased with increasing air speed until  $7\text{--}8\text{ m s}^{-1}$ , whereupon it became relatively constant at approximately  $6.4^\circ$  for bird 1 and  $8.4^\circ$  for bird 2 (Fig. 8A,B). The angle of attack of the tail to the direction of airflow also decreased with increasing air speed, from  $20\text{--}25^\circ$  at  $4\text{ m s}^{-1}$  to  $1\text{--}5^\circ$  at  $12\text{--}14\text{ m s}^{-1}$  (Fig. 8C,D). At the lowest air speeds, tail angle of attack exceeded the body-tilt angle, whereas at air speeds higher than  $6\text{ m s}^{-1}$ , body tilt was greater than that of the tail.

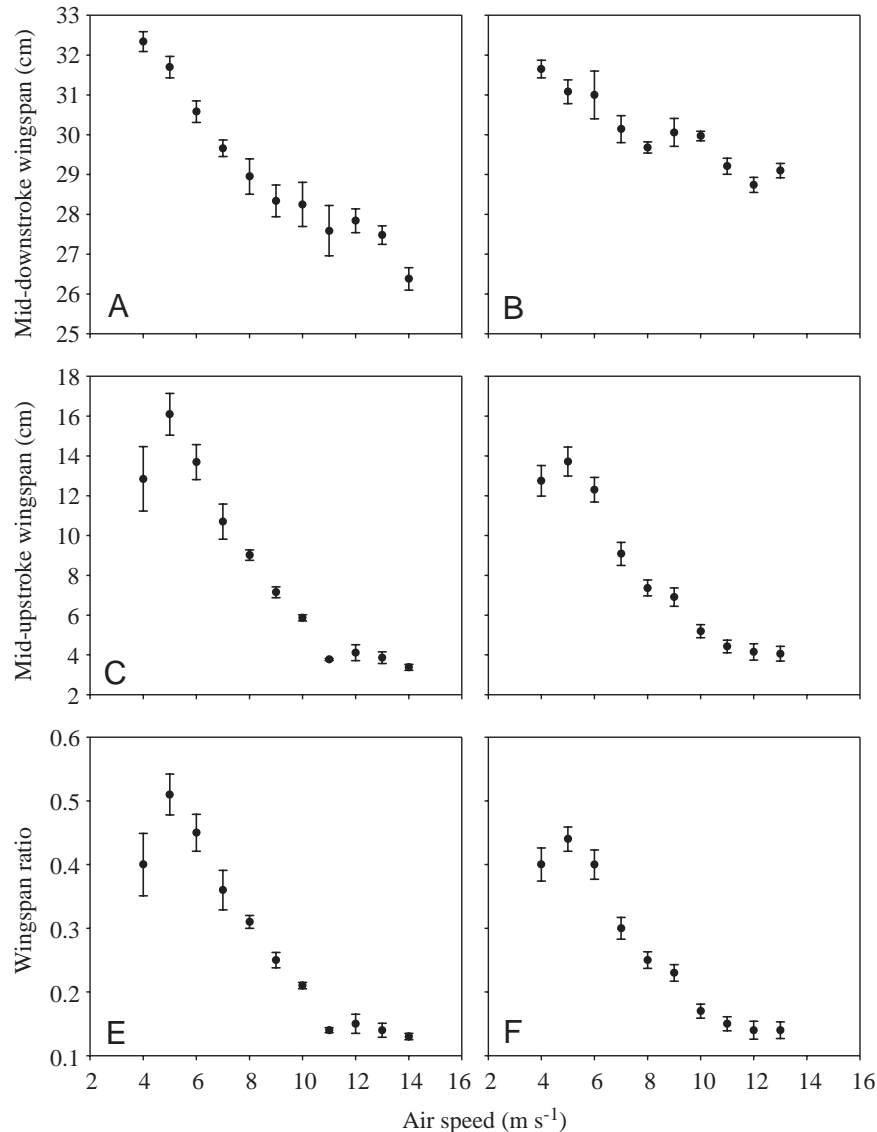

Fig. 4. Mid-downstroke (maximum) wingspan (A,B) decreased with increasing air speed, although for bird 1 (A) this relationship was best represented by a quadratic function and for bird 2 (B), a linear function (GLM; bird 1:  $F_{1,8}=12.54$ ,  $P<0.01$ ,  $r^2=85.9\%$ ; bird 2:  $F_{1,8}=63.42$ ,  $P<0.0001$ ,  $r^2=88.8\%$ ). (C,D) Mid-upstroke (minimum) wingspan (GLM; C, bird 1:  $F_{1,9}=73.37$ ,  $P<0.0001$ ,  $r^2=89.1\%$ ; D, bird 2:  $F_{1,8}=91.09$ ,  $P<0.0001$ ,  $r^2=91.9\%$ ) and (E,F) wingspan ratio (GLM; E, bird 1:  $F_{1,9}=67.61$ ,  $P<0.0001$ ,  $r^2=88.3\%$ ; F, bird 2:  $F_{1,8}=86.72$ ,  $P<0.0001$ ,  $r^2=91.6\%$ ) also decreased with increasing air speed. Values are means  $\pm$  S.E.M. At airspeeds  $11\text{ m s}^{-1}$  (bird 1, A,C,E) and  $10\text{ m s}^{-1}$  (bird 2, B,D,F)  $N=4$ . All other  $N=5$  flight sequences.

#### Estimating body drag coefficient

Pennycuick et al. (Pennycuick et al., 1996) assumed that speeds of minimum power and minimum wingbeat frequency are identical and used this assumption to indirectly estimate the body drag coefficient. They used the flight mechanical theory of Pennycuick (Pennycuick, 1989a), from which it is possible to calculate the mechanical power required for flight and characteristic flight speeds such as the minimum power speed ( $V_{mp}$ ). By changing the body drag coefficient,  $C_{D,par}$ , the mechanical power as calculated by the program will change

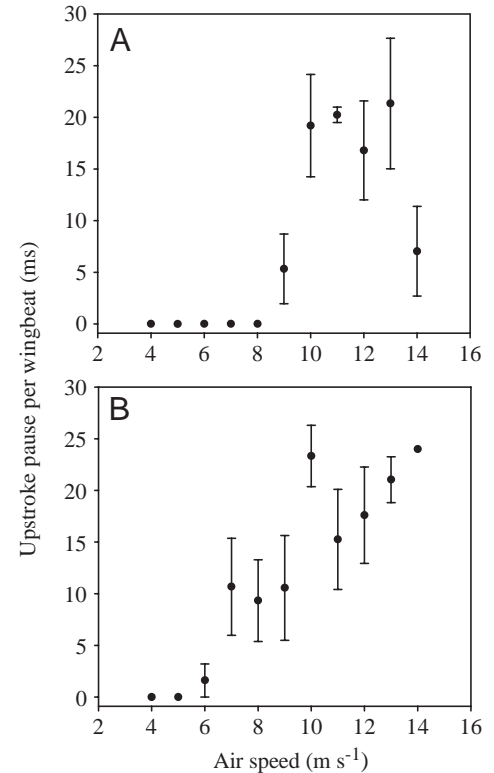

Fig. 5. Upstroke pause duration for bird 1 (A) and bird 2 (B). The average length of these pauses at each air speed was calculated using only those wingbeats containing the pauses (i.e. does not include pauses of zero length). The duration of these pauses reached maximal levels between  $10$  and  $12\text{ m s}^{-1}$ . Values are means  $\pm$  S.E.M. ( $N=5$ ).

and hence also  $V_{mp}$ , equal to the observed speed of minimum wingbeat frequency. Using this method we obtained a  $C_{D,par}=0.03$  for both birds using the estimated speeds of minimum wingbeat frequency (see above).

#### Discussion

The patterns of wingbeat kinematics observed were strikingly similar in the two barn swallows studied, suggesting that our results are general to barn swallows. The function of the tail streamer in the barn swallow is a subject of much debate (Norberg, 1994; Barbosa and Møller, 1999; Evans, 1998; Evans, 1999; Hedenström and Møller, 1999; Buchanan and Evans, 2000), and aerodynamic modelling has been employed to investigate the possible effect of tail streamers on flight (Evans and Thomas, 1992; Thomas, 1993). However, wing kinematics and aerodynamic performance of the swallow as a whole have, to date, been largely ignored. In horizontal flight, our study subjects flew readily from  $4\text{ m s}^{-1}$  to  $13\text{--}14\text{ m s}^{-1}$ ,

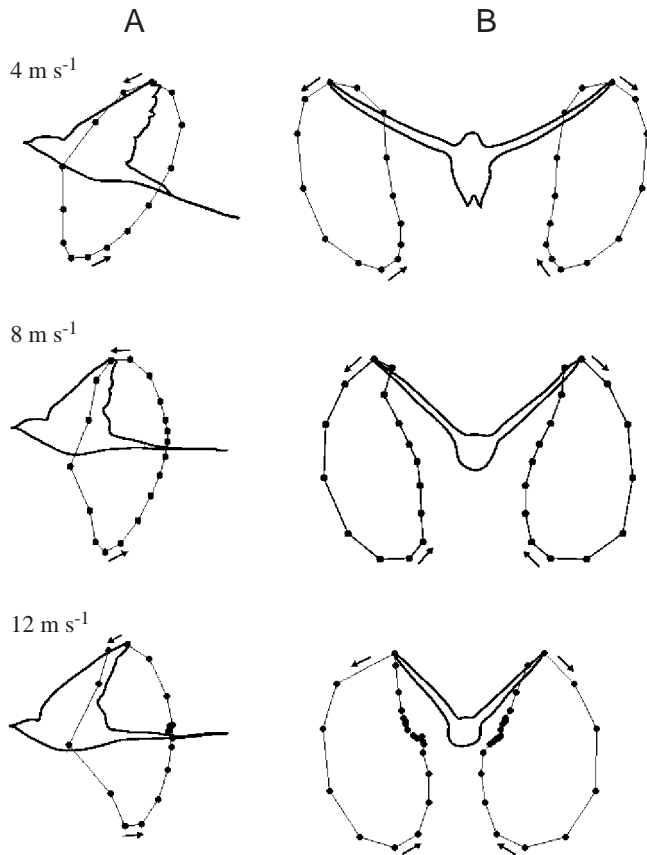

Fig. 6. Wingtip path of a characteristic wingbeat in lateral view (A) and rear view (B) at  $4 \text{ m s}^{-1}$ ,  $8 \text{ m s}^{-1}$  and  $12 \text{ m s}^{-1}$ . Arrows indicate the direction of movement and filled circles indicate the position of the wingtip on each frame, with 8 ms between the nearest circles. The silhouettes illustrate the body posture at the upstroke/downstroke transition.

with steady flight for brief periods ( $<20 \text{ s}$ ) at a maximum speed of  $15 \text{ m s}^{-1}$ . Above about  $7 \text{ m s}^{-1}$ , the tail was furled and the drag from the tail streamers would have been negligible. The area of two tail streamers beyond the trailing edge of the tail is approximately  $150 \text{ mm}^2$  in a barn swallow, which is only about 0.9% of the total projected area of the bird. At lower speeds and during turning, the tail was spread and tail-angle of attack exceeded that of body tilt, probably increasing the lift-to-drag ratio of the whole bird (Thomas, 1993). Our results indicate that the tail as a whole probably has an aerodynamic function at low speed and may provide an additional lifting surface.

#### Wingbeat frequency and body drag

The range of wingbeat frequencies observed during this study (7–9 Hz) corresponds closely to the 8.2 Hz calculated by Pennycuick using a formula based on a barn swallows' size and morphology (Pennycuick, 1996). Danielsen (Danielsen, 1988) measured 9.0 and 9.3 Hz in two barn swallows on migration, i.e. showing a similar wingbeat frequency to our swallows when flying in the higher speed range. Compared

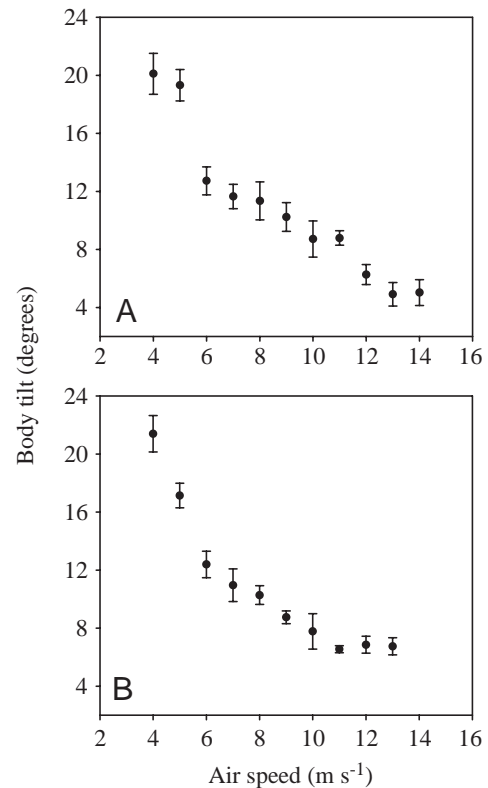

Fig. 7. Body tilt averaged across the upstroke, downstroke and mid-stroke portions of the wingbeat cycle. For both bird 1 (A) and bird 2 (B), body-tilt angle showed a significant quadratic relationship with air speed, and decreased with increasing air speed (GLM; bird 1:  $F_{1,8}=5.92$ ,  $P<0.05$ ; bird 2:  $F_{1,7}=41.78$ ,  $P<0.0001$ ). Values are means  $\pm$  S.E.M. ( $N=5$ ).

with other species of similar size, the swallow has quite low wingbeat frequency and relatively long wings that increase the wing moment of inertia. Wingbeat frequency showed a clear U-shaped relationship with air speed, with minima at  $8.9 \text{ m s}^{-1}$  and  $8.7 \text{ m s}^{-1}$  for bird 1 and bird 2, respectively. A measure of the drag caused by the body (body drag coefficient  $C_{D,par}$ ) is required to calculate the mechanical power requirements of flight in relation to air speed in birds (Pennycuick, 1989a). The speed of minimum wingbeat frequency is believed to be identical with the speed associated with minimum power ( $V_{mp}$ ) (e.g. Pennycuick et al., 1996). Agreement between calculated  $V_{mp}$  (using  $C_{D,par}$ ) and observed wingbeat frequency can be obtained by adjusting the value of  $C_{D,par}$ , allowing a more 'realistic' estimate of  $C_{D,par}$  to be calculated. Pennycuick et al. (Pennycuick et al., 1996) found that, to get a match between calculated  $V_{mp}$  and minimum wingbeat frequency in a thrush nightingale *Luscinia luscinia* and a teal *Anas crecca*,  $C_{D,par}$  had to be set at 0.08 rather than the 'old default' value of 0.4 (cf. Pennycuick, 1989a). Using the same technique for the two swallows, we found that  $C_{D,par}$  must be reduced even more to 0.03. However, on considering the plots of wingbeat frequency in relation to speed (Fig. 1), one will note two minima, at  $7\text{--}8 \text{ m s}^{-1}$  and  $10 \text{ m s}^{-1}$ , with slightly elevated values inbetween. This pattern is present in both birds and can be

attributed to the upstroke pauses observed at speeds above about  $7\text{--}9\text{ m s}^{-1}$ , which causes the apparent wingbeat frequency to decline and shifts the speed of minimum wingbeat frequency upwards. Hence, the continuous flapping flight speed of minimum wingbeat frequency should be lower, and closer to the speed of minimum power than the apparent values estimated from Fig. 1. Hence, if the lower ends of the 95% confidence limits around the estimated minima are used for speeds of minimum wingbeat frequency ( $7.88$  and  $8.00\text{ m s}^{-1}$  for bird 1 and bird 2, respectively), we get  $C_{D,\text{par}}=0.05$  and  $0.04$  for the two birds, respectively. Although swallows are streamlined birds, these values seem extremely low.

Pennycuick et al. (Pennycuick et al., 2000) developed a new technique for directly estimating the mechanical power required to fly in birds. This method is based on the observation that the birds' body exhibits vertical movements, such that it raises its position in relation to the horizontal during the downstroke, when most of the lift force is generated, and lowers its position during the upstroke. By measuring the amplitude of the humeral excursion and angular velocity of the wings, Pennycuick et al. (Pennycuick et al., 2000) were able to calculate the mechanical power output of a swallow (swallow 1 of this study). The mechanical power was only calculated for speeds of  $6\text{--}11\text{ m s}^{-1}$ ;  $C_{D,\text{par}}$  was set to  $0.26$  and the profile power ratio  $X_1$  to  $2.25$ . These values achieved the best fit between calculations of the mechanical power using the body drag coefficient and profile power ratio (Pennycuick, 1989a) and the average mechanical power derived from wind-tunnel observations (see Pennycuick et al., 2000 for details). The  $V_{\text{mp}}$  was estimated at  $5.3\text{ m s}^{-1}$  for this swallow and these parameter settings, which is clearly outside the 95% confidence interval for the speed of minimum wingbeat frequency ( $7.9\text{--}9.9\text{ m s}^{-1}$ , see Results). Estimating  $C_{D,\text{par}}$  on the basis of wingbeat frequency, therefore, may not be valid in this species.

#### Flight mode and kinematics of wings and tail

Many smaller bird species exhibit bounding or intermittent flight, in which bursts of wingbeats are followed by periods without wingbeats (e.g. Rayner, 1985; Tobalske et al., 1999). There are two main explanations for the function of bounding flight; the first postulates that the total drag taken over an entire bounding cycle is lower than if the bird flapped its wings continuously because the profile drag is reduced by folding the wings for a fraction of the cycle (Lighthill, 1977). The second explanation, the 'fixed-gear hypothesis',

assumes that the fibres of the pectoralis muscle restrict small birds to a narrow range of frequencies where the efficiency of the muscle is maximum (Rayner, 1985). This second hypothesis implies that bounding is a means of adjusting the power output to the level required for a certain flight speed. In zebra finches, the wingbeat frequency increased from  $25\text{ Hz}$  at  $0\text{ m s}^{-1}$  (hovering) to  $27\text{ Hz}$  at  $14\text{ m s}^{-1}$  (Tobalske et al., 1999), a 12% increase compared with the 19% and 29% increase from minimum to maximum wingbeat frequency in the two swallows in the present study. It is possible that differences in the relative ranges of wingbeat frequencies used over the same range of speeds in zebra finch and barn swallow represent the variation between a typical bounding species using continuous flapping and flap-gliding. The upstroke pauses seen in the swallows may be a way to adjust the force generation to the required level at medium and high speeds, and may perhaps be regarded as intermittent flap-gliding (cf. Danielsen, 1988).

Amplitude increased with speed which, combined with downstroke duration, yielded a nearly constant downstroke angular velocity between  $4$  and  $7\text{ m s}^{-1}$ , which then increased with further increases in air speed. Changes of these parameters are closely linked to the force generation of the wings and the

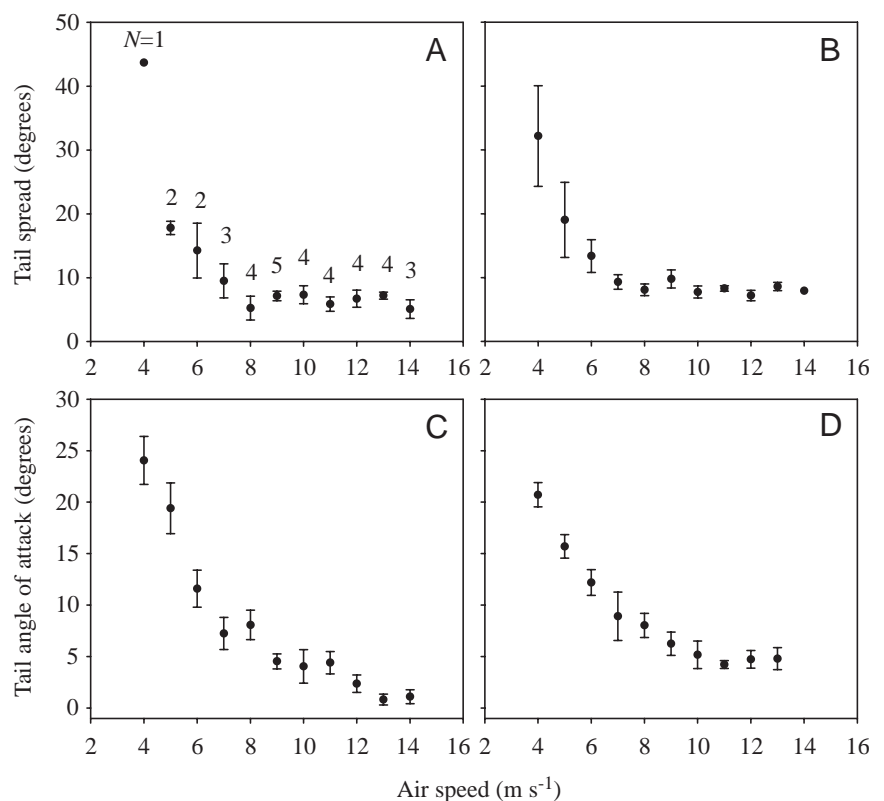

Fig. 8. Tail spread (A,B) decreased with increasing air speed, although for bird 1 (A) this relationship was best represented by a cubic function, and for bird 2 (B) a quartic function (GLM; bird 1:  $F_{1,7}=17.61$ ,  $P<0.01$ ; bird 2:  $F_{1,5}=13.05$ ,  $P<0.05$ ). Tail-angle of attack (C,D) also decreased with increasing air speed, and for both birds this relationship was best represented by a cubic function (GLM; C, bird 1:  $F_{1,7}=8.36$ ,  $P<0.05$ ; D, bird 2:  $F_{1,6}=6.42$ ,  $P<0.05$ ). The angle of tail spread in some of the flight sequences for bird 1 (A) was obscured: the number of flight sequences for which tail-spread angle data were obtained, therefore, varies between 1 and 5. All other  $N=5$ . Values are means  $\pm$  S.E.M.



power output (cf. Pennycuick et al., 2000). The wingtip showed an elliptical path when viewed laterally, with the centre of the ellipse moving back along the horizontal axis of the bird with increasing air speed. This is similar to observations of pigeons at speeds of  $10 \text{ m s}^{-1}$  and above, but not magpies, which show no apparent differences in relation to speed (Tobalske and Dial, 1996). It is perhaps due to this that the pigeon and the swallow are more similar with respect to wing morphology than the swallow and magpie.

The reduction in the degree of body tilt and tail spread with increasing speed is similar to that reported for magpies and pigeons by Tobalske and Dial (Tobalske and Dial, 1996). In addition, our data show that the tail angle of attack exceeds body tilt at low air speeds, and decreases with increasing speed. These observations suggest that there is an aerodynamic function of the tail at low speeds. Thomas (Thomas, 1996) used a simple aerodynamic model to argue that the power required for flight at low speeds can be reduced by increasing both the degree of tail spread and the angle of attack. While there are broad similarities in the direction of change predicted by the model and that observed in this study, there are both qualitative and quantitative differences which indicate that modifications to the model are required (M. R. Evans, M. Rosén, K. J. Park and A. Hedenström, in preparation).

#### Variable wing span

Pennycuick (Pennycuick, 1989b) developed a method for calculating the lift:drag ratio based on the 'span ratio', i.e. the ratio of the wingspan during the upstroke to that during the downstroke, assuming that the circulation of the wingtip vortices and the lift distribution remains constant throughout the cycle. A concertina wake concomitant with these properties was observed in a kestrel *Falco tinnunculus* (Spedding, 1987). A requirement for applying the simplified span ratio method to calculations of effective lift:drag ratios is that the durations of the up- and downstrokes are the same (Pennycuick, 1989b), which was obviously violated in our swallows (see Fig. 2). The span ratio declined with increasing speed from 0.5 at  $5 \text{ m s}^{-1}$  to about 0.2 or less at  $10\text{--}11 \text{ m s}^{-1}$ , but it was 0.4 at  $4 \text{ m s}^{-1}$ . The lower value at  $4 \text{ m s}^{-1}$  indicates that the upstroke is feathered at this speed and provides no lift, although the upstroke does provide small lift forces at higher speeds ( $\geq 6 \text{ m s}^{-1}$ ), as indicated by the observations of vertical accelerations of the body (Pennycuick et al., 2000). The swallow body accelerated downwards during the wing upstroke, although not as much as during a free fall, which is evidence of an upward lift force. An interesting observation regarding the span ratio was that the wingspan at mid-downstroke declined from the maximum possible at  $4 \text{ m s}^{-1}$ , with a 3–5 cm reduction in wingspan at higher speeds. We did not observe any drastic changes in either the upstroke or the downstroke kinematics, suggesting that the wingbeat kinematics change in a continuous manner in relation to air speed. Such changes of kinematics differ from those predicted by the 'gait theory' of flapping forward flight, but as yet we have no data on the actual vortex wakes of these birds. The

span during the upstroke declined even more than during the downstroke, resulting in the overall decline in span ratio. Even if the span reduction during downstrokes was quite small, it may be analogous to the wingspan adjustments in gliding flight (Tucker, 1987). In gliding flight, reducing the span with increasing speed increases the overall lift:drag ratio of the bird, by trading profile drag against required lift production. We propose that by reducing the span at high speeds the swallow will reduce the profile drag and yet produce enough lift to overcome induced and parasite drag. This analogy does not, however, apply to Pennycuick's (Pennycuick, 1989a) method of calculating the profile power as a multiple of the 'absolute minimum power' – a quantity that is proportional to  $b^{-3/2}$ , where  $b$  is wingspan. Then profile power is always minimum with maximum wingspan and there is no trade-off with induced power. In pigeons and magpies, also studied in a wind tunnel, the span during mid-downstroke was constant across a wide speed range (Tobalske and Dial, 1996). Other bird species with high aspect ratio wings, such as the arctic tern *Sterna paradisaea* and skuas *Stercorarius* spp., likewise flex their wings and reduce their wingspan during downstroke when observed in fast cruising or chasing flights (A. Hedenström and M. Rosén, personal observations).

Depending on size and structure there are many ways that birds can adjust the lift and power output required in relation to speed, including changing wingbeat frequency, wingbeat amplitude, span and span ratio, body-tilt angle, tail-angle of attack, etc. Considering the plasticity in this system, some caution may be warranted when equating speeds of minimum wingbeat frequency and minimum power (cf. Pennycuick et al., 2000). There is a continuum with respect to flight kinematics between continuous flapping flight and bounding flight, including the intermittent flap-gliding represented by the upstroke pauses seen in the swallows, and where a particular species falls on this continuum is determined by its size, and wing and muscle morphology. These characters are, in turn, the products of evolutionary adaptations moulded by a species' flight requirements.

We are grateful to Colin J. Pennycuick for discussions and suggestions about swallow flight, and to Matthew Evans for comments on a previous draft of this manuscript. Financial support for K.P. was provided by NERC grant GR3/10600 to M. R. Evans and the Swedish Natural Science Research Council and the Carl Tryggers foundation to A.H.

#### References

- Barbosa, A. and Møller, A. P. (1999). Aerodynamic costs of long tails in male barn swallows *Hirundo rustica* and the evolution of sexual size dimorphism. *Behav. Ecol.* **10**, 128–135.
- Buchanan, K. L. and Evans, M. R. (2000). The effect of tail streamer length on aerodynamic performance in the barn swallow. *Behav. Ecol.* **11**, 228–238.
- Danielsen, R. (1988). Bounding flight in passerines: some empirical data. *Dansk Orn. Foren. Tidsskr.* **82**, 59–60.
- Evans, M. R. (1998). Selection on swallow tail streamers. *Nature* **394**, 233–234.

- Evans, M. R.** (1999). Length of tail streamers in barn swallows – reply to Hedenström and Møller. *Nature* **397**, 115–116.
- Evans, M. R. and Thomas, A. L. R.** (1992). The aerodynamic and mechanical effects of elongated tails in the scarlet-tufted malachite sunbird: measuring the cost of a handicap. *Anim. Behav.* **43**, 337–347.
- Hedenström, A. and Møller, A. P.** (1999). Lengths of tail streamers in barn swallows. *Nature* **397**, 115.
- Lighthill, M. J.** (1977). Introduction to the scaling of aerial locomotion. In *Scale Effects in Animal Locomotion* (ed. T. J. Pedley), pp. 365–404. London: Academic Press.
- MathSoft Inc.** (2000). *S-Plus 2000 Guide to Statistics*, volume 2. Data Analysis Products Division, MathSoft, Seattle, WA, USA.
- Norberg, R. Å.** (1994). Swallow tail streamer is a mechanical device for self-deflection of tail leading edge, enhancing aerodynamic efficiency and flight manoeuvrability. *Proc. R. Soc. Lond. B* **257**, 227–233.
- Pennycuik, C. J.** (1975). Mechanics of flight. In *Avian Biology*, volume 5 (ed. D. S. Farner and J. R. King), pp. 1–75. London: Academic Press.
- Pennycuik, C. J.** (1989a). *Bird Flight Performance: A Practical Calculation Manual*. Oxford: Oxford University Press.
- Pennycuik, C. J.** (1989b). Span-ratio analysis used to estimate effective lift:drag ratio in the double-crested cormorant *Phalacrocorax auritus* from field observations. *J. Exp. Biol.* **142**, 1–15.
- Pennycuik, C. J.** (1996). Wingbeat frequency of birds in steady cruising flight: new data and improved predictions. *J. Exp. Biol.* **199**, 1613–1618.
- Pennycuik, C. J., Alerstam, T. and Hedenström, A.** (1997). A new low-turbulence wind tunnel for bird flight experiments at Lund University, Sweden. *J. Exp. Biol.* **200**, 1441–1449.
- Pennycuik, C. J., Hedenström, A. and Rosén, M.** (2000). Horizontal flight of a swallow (*Hirundo rustica*) observed in a wind tunnel, with a new method for directly measuring mechanical power. *J. Exp. Biol.* **203**, 1755–1765.
- Pennycuik, C. J., Klaassen, M., Kvist, A. and Lindström, Å.** (1996). Wingbeat frequency and the body drag anomaly: wind-tunnel observations on a thrush nightingale (*Luscinia luscinia*) and a teal (*Anas crecca*). *J. Exp. Biol.* **199**, 2757–2765.
- Rayner, J. M. V.** (1979). A new approach to animal flight mechanics. *J. Exp. Biol.* **80**, 17–54.
- Rayner, J. M. V.** (1985). Bounding and undulating flight in birds. *J. theor. Biol.* **117**, 47–77.
- Rayner, J. M. V.** (1995). Flight mechanics and constraints on flight performance. *Israel J. Zool.* **41**, 321–342.
- Rayner, J. M. V.** (1999). Estimating power curves of flying vertebrates. *J. Exp. Biol.* **202**, 3449–3461.
- Ryan, B. F., Joiner, B. I. and Ryan, T. A.** (1985). *MINITAB Handbook*, 2<sup>nd</sup> edition. Boston: PWS-Kent.
- Spedding, G. R.** (1987). The wake of a kestrel (*Falco tinnunculus*). *J. Exp. Biol.* **127**, 59–78.
- Thomas, A. L. R.** (1993). On the aerodynamics of birds' tails. *Phil. Trans. R. Soc. Lond. B* **340**, 361–380.
- Thomas, A. L. R.** (1995). *On the tails of birds*. PhD thesis, University of Lund, Sweden.
- Thomas, A. L. R.** (1996). The flight of birds that have wings and a tail: variable geometry expands the envelope of flight performance. *J. theor. Biol.* **183**, 237–245.
- Tobalske, B. W.** (1995). Neuromuscular control and kinematics of intermittent flight in the European starling (*Sturnus vulgaris*). *J. Exp. Biol.* **198**, 1259–1273.
- Tobalske, B. W.** (1996). Scaling of muscle composition, wing morphology, and intermittent flight behavior in woodpeckers. *Auk* **113**, 151–177.
- Tobalske, B. W. and Dial, K. P.** (1994). Neuromuscular control and kinematics of intermittent flight in budgerigars (*Melopsittacus undulatus*). *J. Exp. Biol.* **187**, 1–18.
- Tobalske, B. W. and Dial, K. P.** (1996). Flight kinematics of black-billed magpies and pigeons over a wide range of speeds. *J. Exp. Biol.* **199**, 263–280.
- Tobalske, B. W., Peacock, W. L. and Dial, K. P.** (1999). Kinematics of flap-bounding flight in the zebra finch over a wide range of speeds. *J. Exp. Biol.* **202**, 1725–1739.
- Tucker, V. A.** (1987). Gliding birds: the effect of variable wing span. *J. Exp. Biol.* **133**, 33–58.
